# Supplementary material for: Community Air Sensor Network (CAIRSENSE) project: evaluation of low-costsensor performance in a suburban environment in the southeastern UnitedStates
Source: Copernicus journal article supplement (doi:10.5194/amt-9-5281-2016), 2016-11-01
Supplement: Supplementary file [file amt-9-5281-2016-supplement.pdf]

Supplement of Atmos. Meas. Tech., 9, 5281–5292, 2016  
<http://www.atmos-meas-tech.net/9/5281/2016/>  
doi:10.5194/amt-9-5281-2016-supplement  
© Author(s) 2016. CC Attribution 3.0 License.

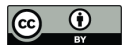

*Supplement of*

**Community Air Sensor Network (CAIRSENSE) project: evaluation of low-cost sensor performance in a suburban environment in the southeastern United States**

**Wan Jiao et al.**

*Correspondence to:* Gayle Hagler ([hagler.gayle@epa.gov](mailto:hagler.gayle@epa.gov))

The copyright of individual parts of the supplement might differ from the CC-BY 3.0 licence.

**Table S1.** Multiple Regression Models for Selected Sensors with Environmental Artifact Corrections

| Averaging Time | Pollutant       | Sensor             | Artifact Variable | R <sup>2</sup> <sub>adj</sub> | Equation                                                    |
|----------------|-----------------|--------------------|-------------------|-------------------------------|-------------------------------------------------------------|
| 12-hr          | PM              | Shinyei SAFT-2     | RH, Day           | 0.42                          | $C_{FEM} = 11.3 + 0.787C - 0.0400RH - 0.0112Day$            |
|                |                 | Dylos SAFT-2 Small | RH, Day           | 0.60                          | $C_{FEM} = 14.8 + 0.00164C_{Sensor} - 0.0751RH - 0.0358Day$ |
|                |                 | Airbeam SAFT-2     | RH, Day           | 0.51                          | $C_{FEM} = 12.2 + 0.00203C_{Sensor} - 0.0693RH - 0.0167Day$ |
| Hourly         | O <sub>3</sub>  | Aeroqual SAFT-1    | NA                |                               |                                                             |
|                |                 | CairClip SAFT-1    | RH                | 0.95                          | $C_{FEM} = 26.6 + 0.709C_{Sensor} - 0.175RH$                |
|                | NO <sub>2</sub> | CairClip SAFT-1    | T, RH             | 0.81                          | $C_{FEM} = 26.2 + 1.18C_{Sensor} - 0.483T - 0.129RH$        |
|                | NO              | AQMesh SAFT-1      | NA                |                               |                                                             |
|                | CO              | AQMesh SAFT-1      | Day               | 0.75                          | $C_{FEM} = -7.09E-02 + 8.88E-04C_{Sensor} + 2.52E-03Day$    |

**Table S2.** Linear Regression Equations Used to Correct Wireless Sensor Network (WSN) Hourly Sensor Data

| Pollutant      | Sensor      | r <sup>2</sup> | Equation                         |
|----------------|-------------|----------------|----------------------------------|
| PM             | N1 Shinyei  | 0.20           | $C_{FEM} = 0.5C_{Sensor} + 7.3$  |
|                | N2 Shinyei  | 0.21           | $C_{FEM} = 0.66C_{Sensor} + 7.3$ |
|                | N3 Shinyei  | 0.17           | $C_{FEM} = 0.96C_{Sensor} + 6.4$ |
|                | N4 Shinyei  | 0.18           | $C_{FEM} = 0.53C_{Sensor} + 6.4$ |
| O <sub>3</sub> | N1 Aeroqual | 0.39           | $C_{FEM} = 630C_{Sensor} + 8.9$  |
|                | N4 Aeroqual | 0.76           | $C_{FEM} = 815C_{Sensor} + 5.6$  |

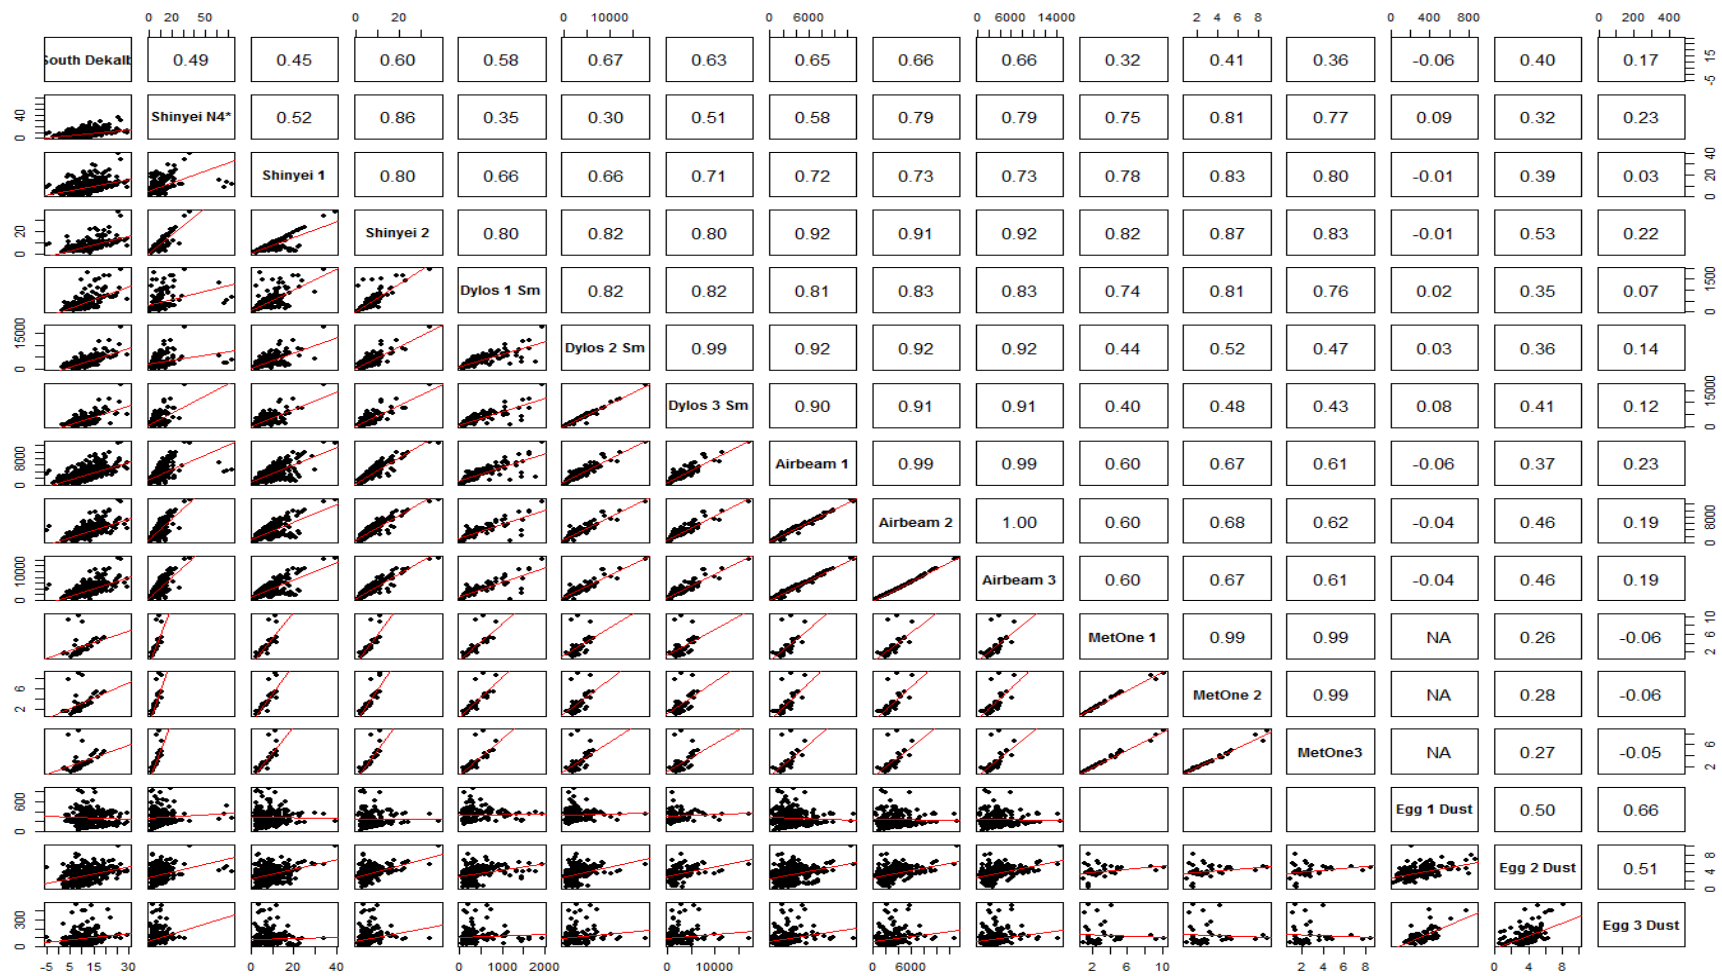

**Figure S1.** Scatterplot and correlation matrix of 12-hr average PM readings between sensors and co-located FEM instrument. Raw sensor units are shown in the comparison. Linear regressions are superimposed on pairwise plots. (\*: data with aluminum foil added)

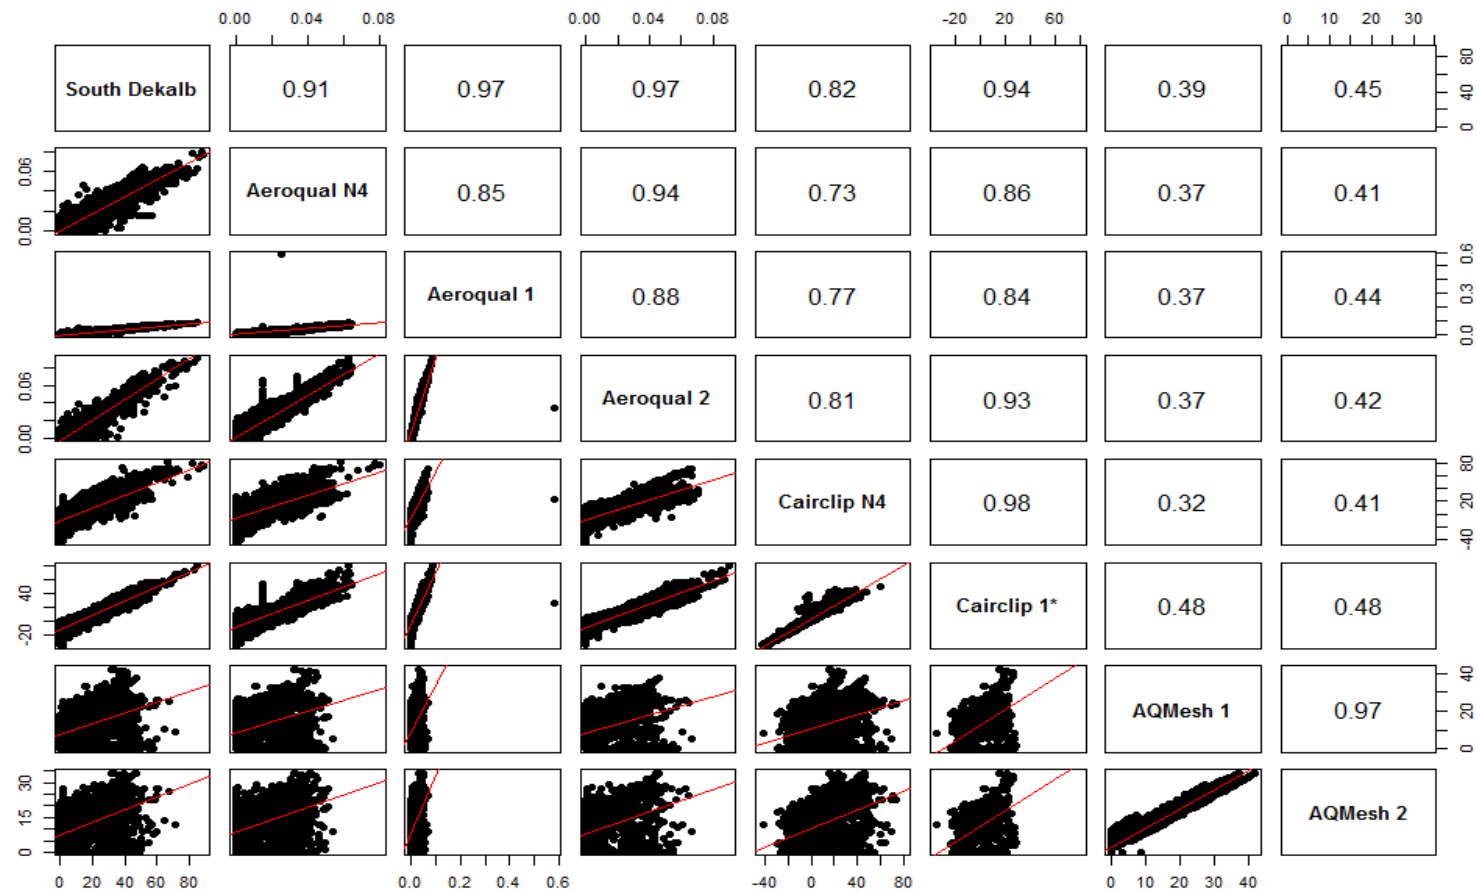

**Figure S2.** Scatterplot and correlation matrix of hourly average ozone readings between sensors and co-located FEM instrument. Raw sensor units are shown in the comparison. Linear regressions are superimposed on pairwise plots. (\*: data after sensor replacement on 2014/11/15).

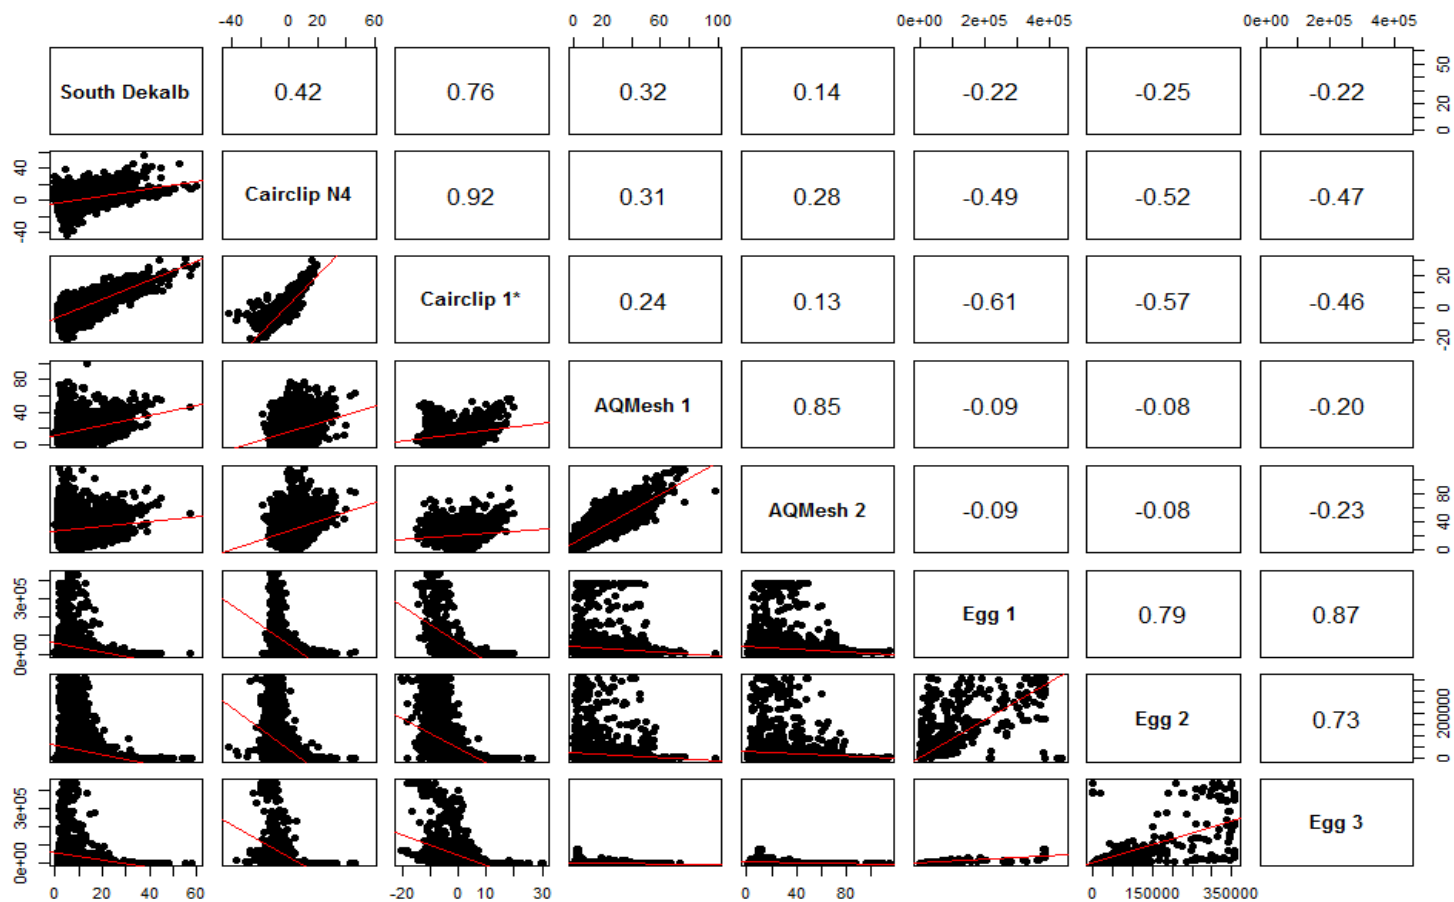

**Figure S3.** Scatterplot and correlation matrix of hourly average NO<sub>2</sub> readings between sensors and co-located FEM instrument. Raw sensor units are shown in the comparison. Linear regressions are superimposed on pairwise plots. (\*: data after sensor replacement on 2014/11/15).

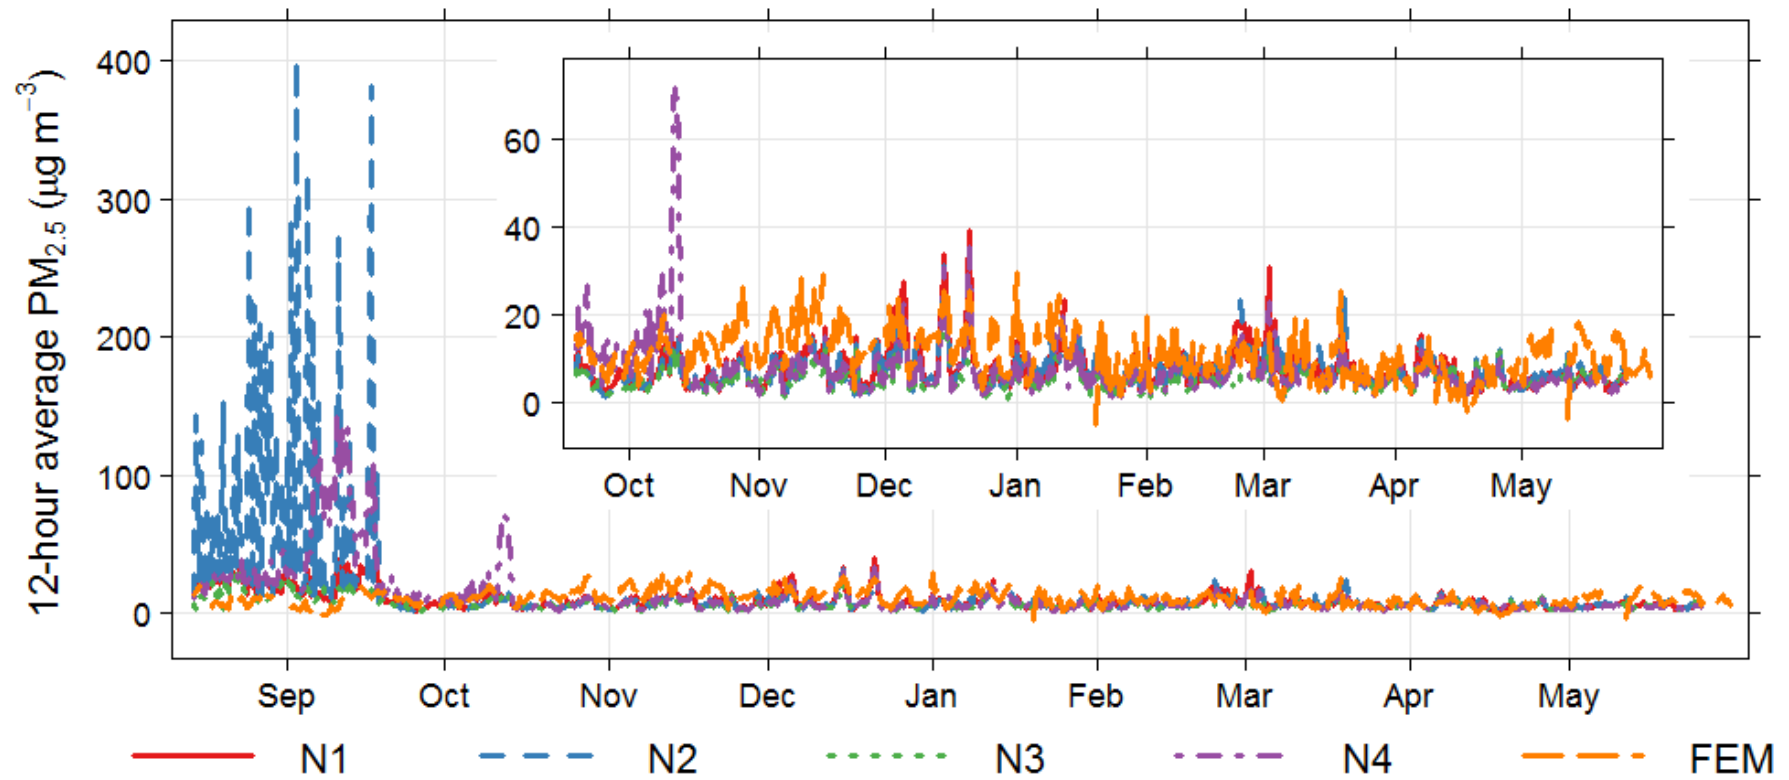

**Figure S4.** Effect of adding aluminum foil on 2014/09/18 to avoid spurious readings in Shinyei sensors for Wireless Sensor Network nodes.

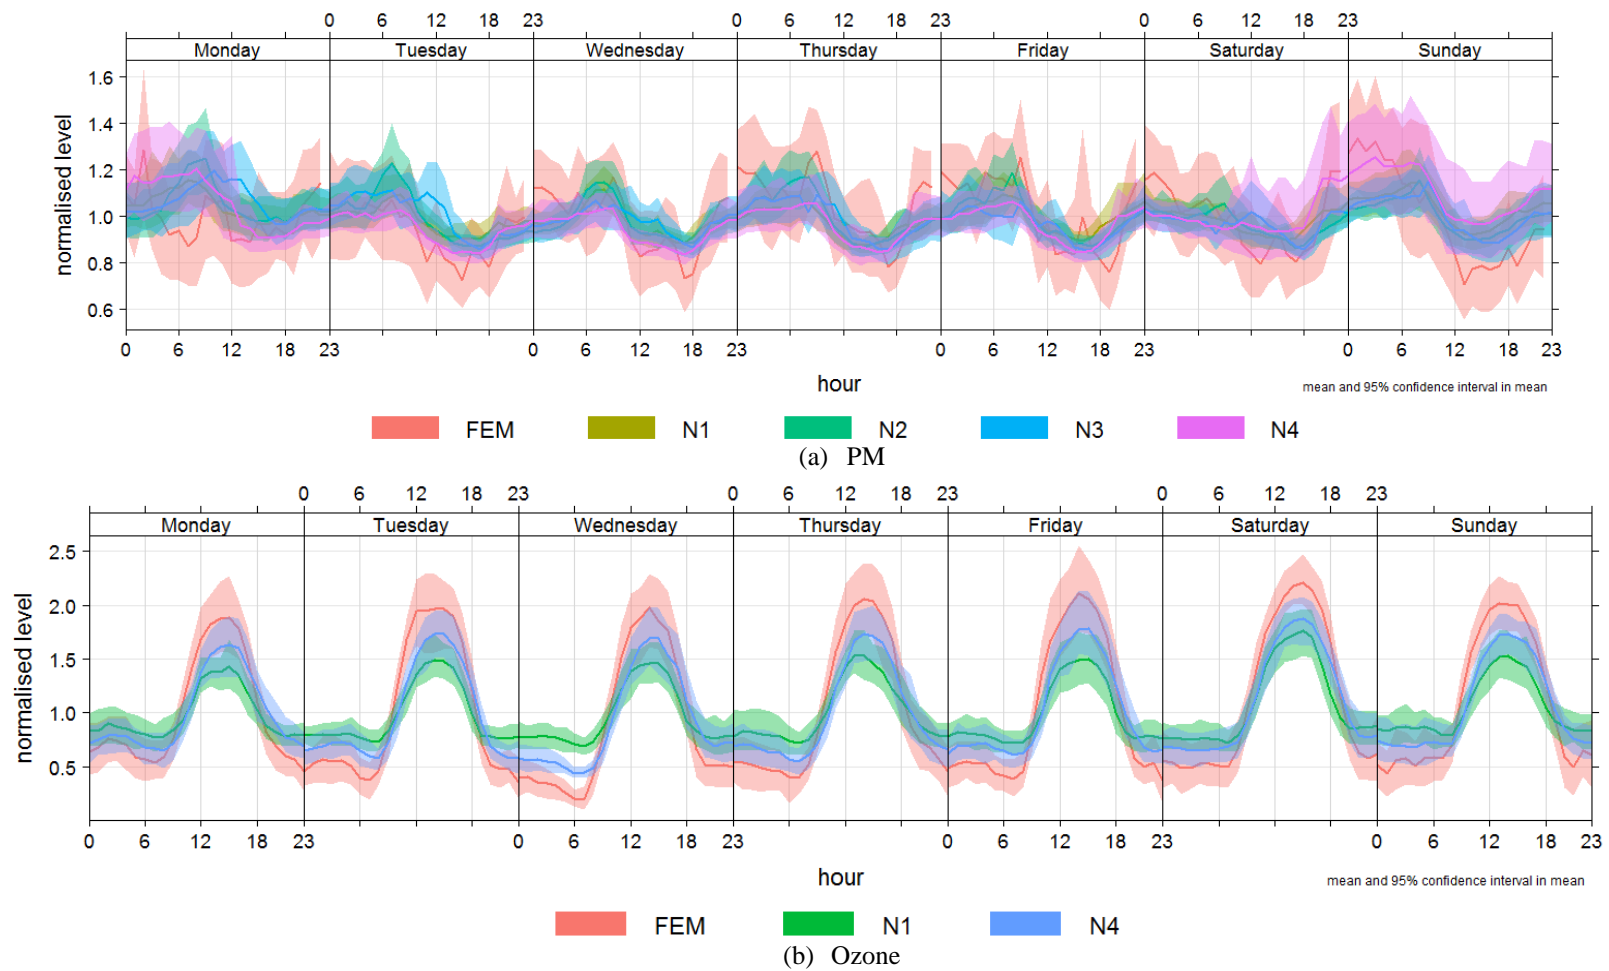

**Figure S5.** Time variation in Wireless Sensor Network with FEM-corrected hourly PM (with aluminum foil) and ozone sensor measurements.

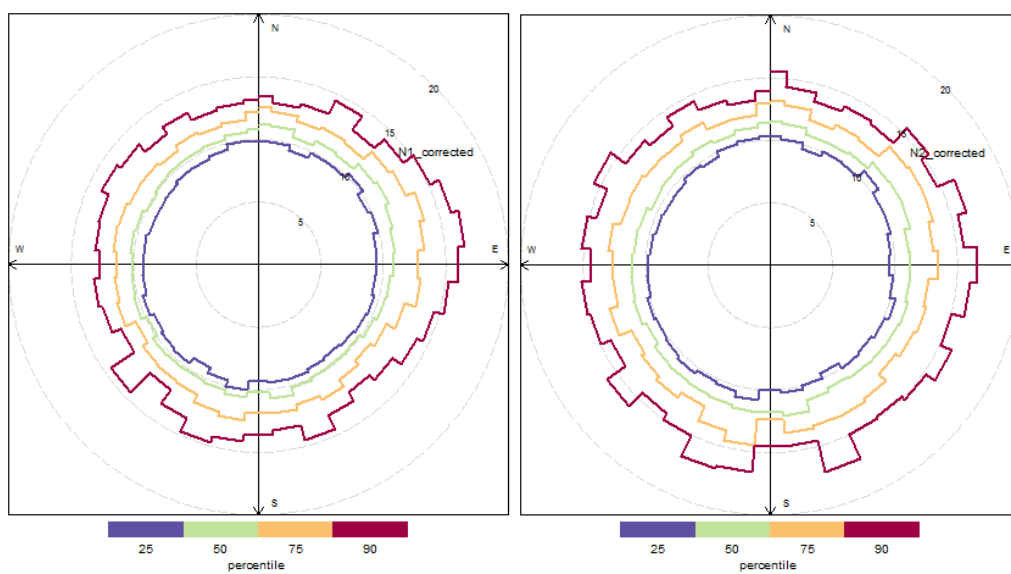

(a) Near-road Node 1 Shinyei PM

(b) Node 2 Shinyei PM

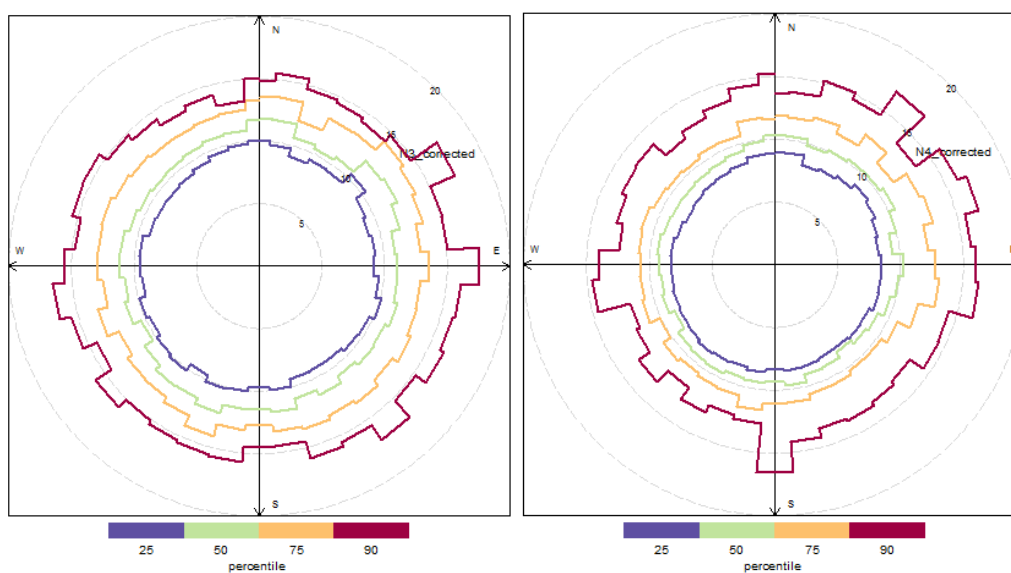

(c) Node 3 Shinyei PM

(d) NCore co-located Node 4 Shinyei PM

**Figure S6.** Example percentile rose plots of wireless sensor network (WSN) Shinyei sensors for hourly FEM-corrected PM between mid-September 2014 and May 2015.
